# Supplementary material for: Sexual competition and the evolution of condition‐dependent ageing
Source: PubMed Central journal article supplement (PMC6089505; doi:10.1002/evl3.36), 2018-01-13
Supplement: EVL3-2-37-s001.pdf [file EVL3-2-37-s001.pdf]

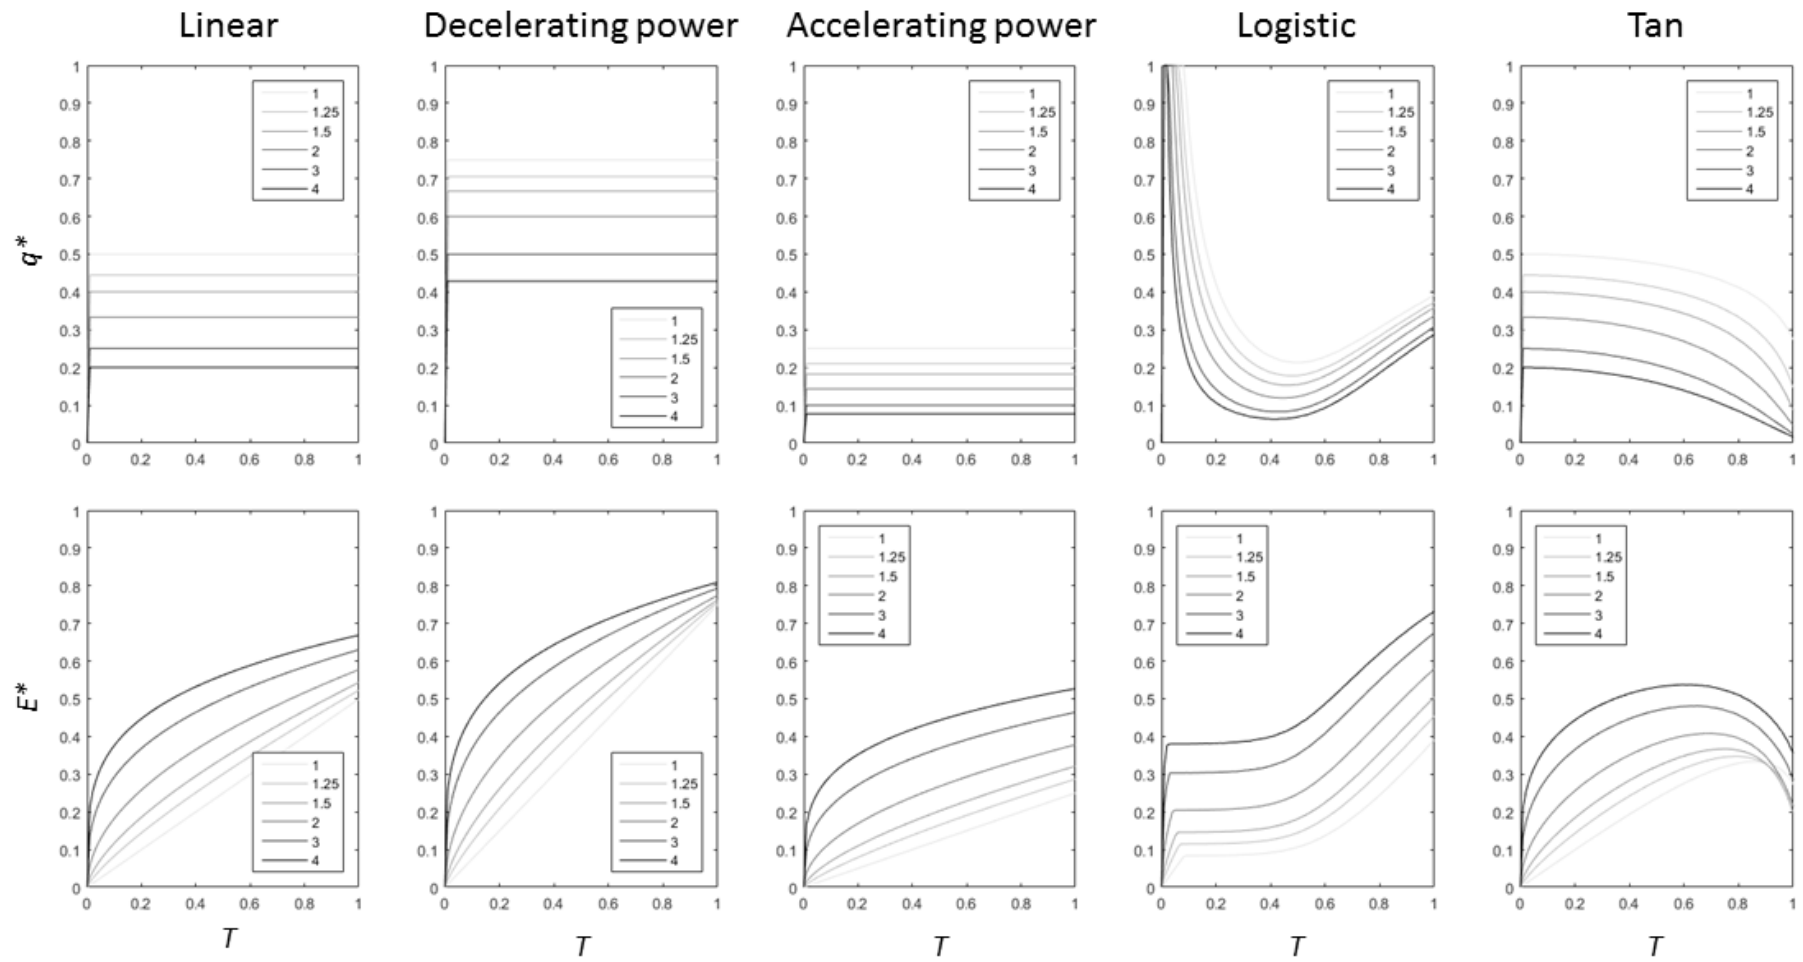

**Fig. S1** The change in  $q^*$  and  $E^*$  with increasing condition for each model investigated for six different potential relationships between somatic maintenance and lifespan, where  $s=0$ . In each case  $p$  is given in the legend.

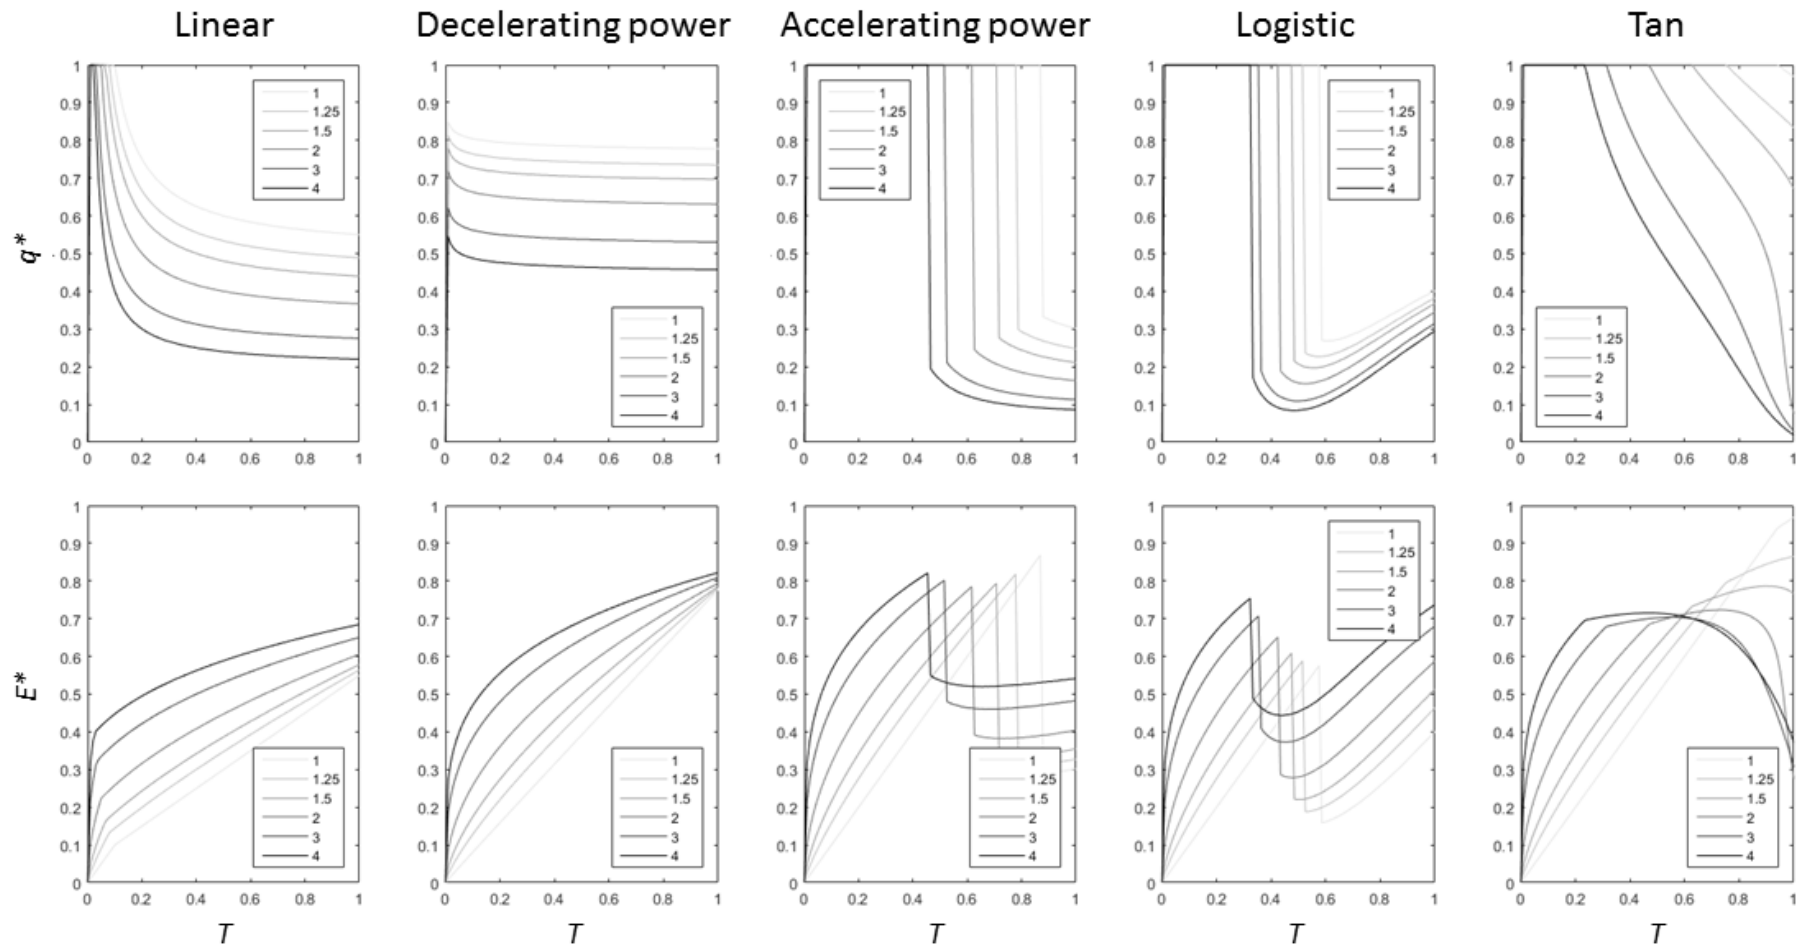

**Fig. S2** The change in  $q^*$  and  $E^*$  with increasing condition for each model investigated for six different potential relationships between somatic maintenance and lifespan, where  $s=0.1$ . In each case  $p$  is given in the legend.

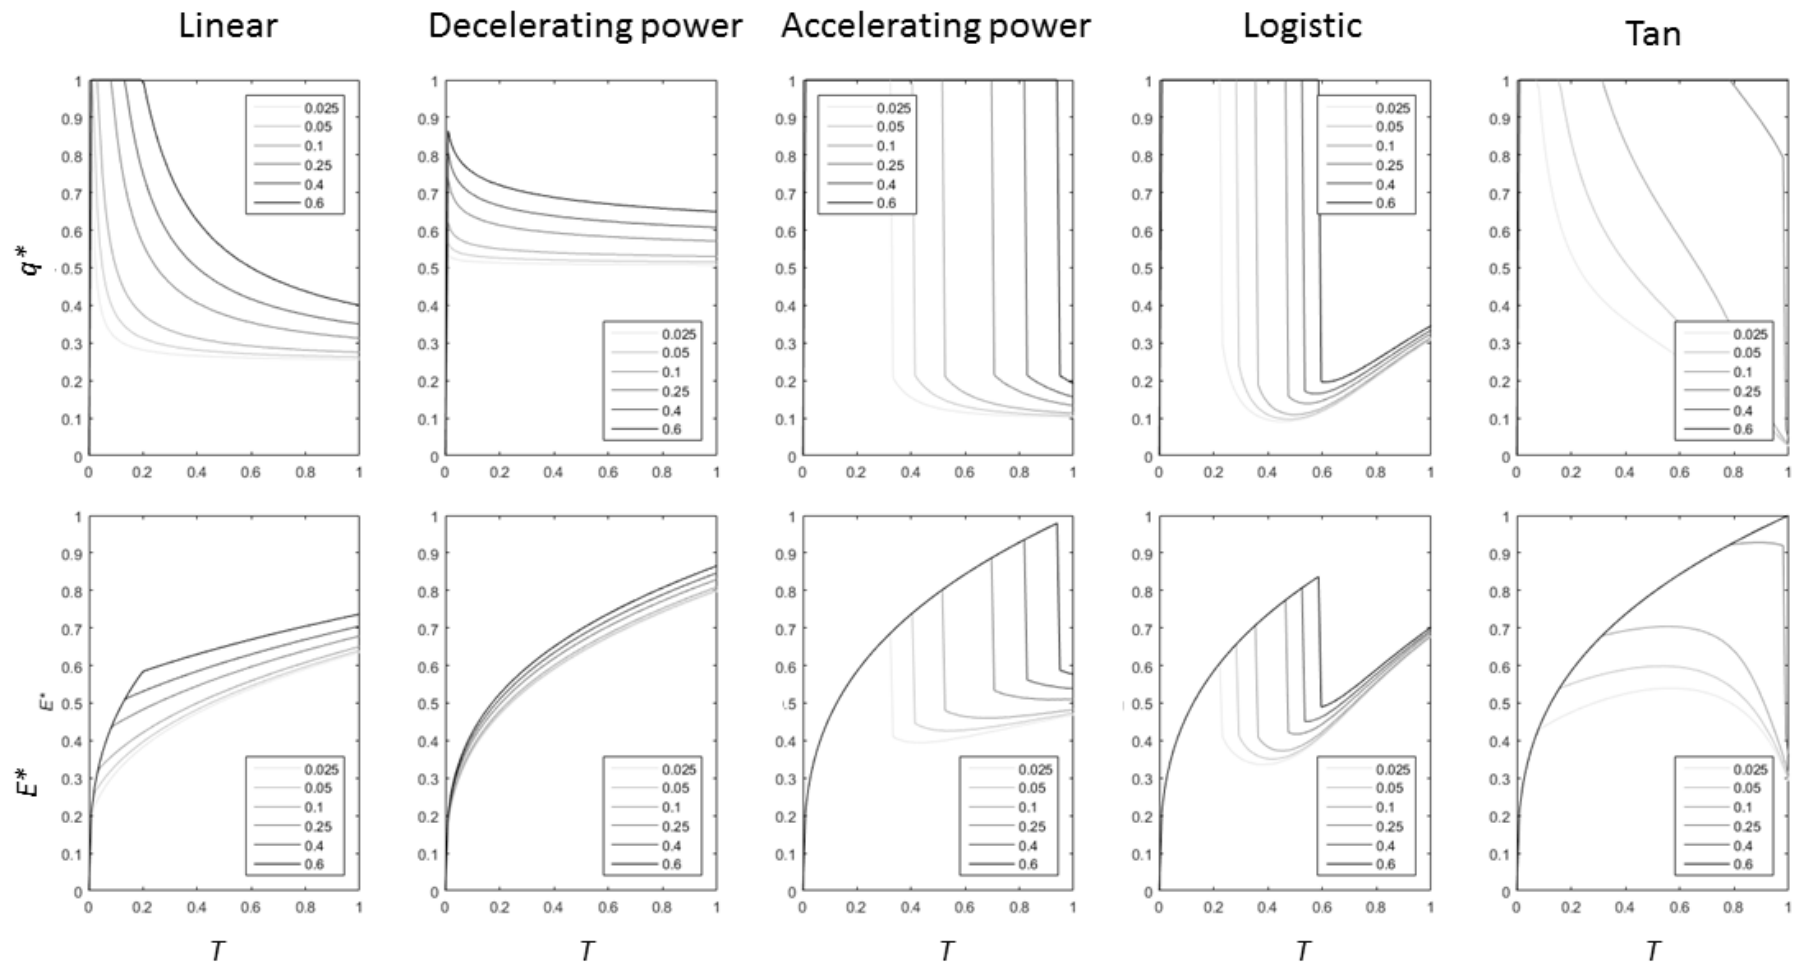

**Fig. S3** The change in  $q^*$  and  $E^*$  with increasing condition for each model investigated for six different potential values of  $s$ . In each case  $s$  is given in the legend.

A:  $s=0$

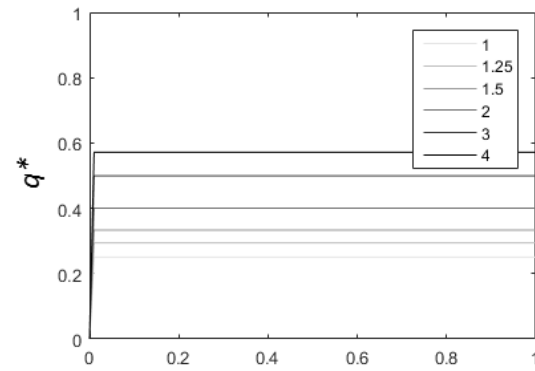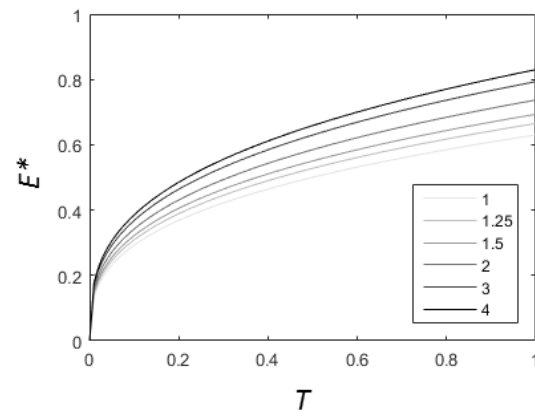

B:  $s=0.1$

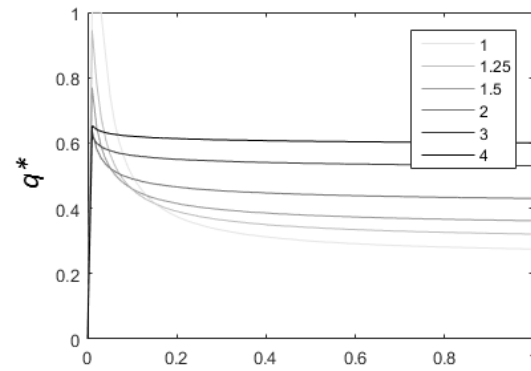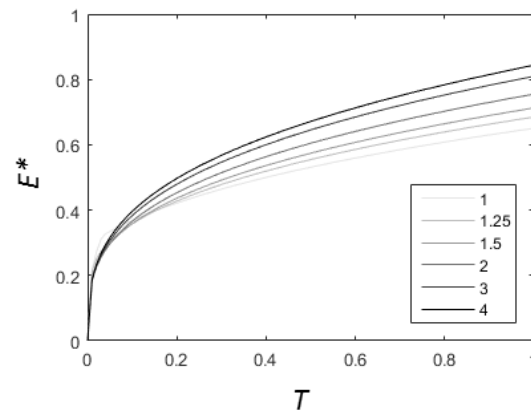

**Fig S4.** The change in  $q^*$  and  $E^*$  with increasing condition for six fitness functions where the relationship between secondary sexual trait expression and mating success is a decelerating power function, where  $s=0$  (A), and  $s=0.1$  (B). The value of  $m$  for each function is shown in the legend.
